# Supplementary material for: Effects of short-term nitrogen and phosphorus addition on leaf stoichiometry of a dominant alpine grass
Source: PeerJ. 2021 Dec 22;9:e12611. doi: 10.7717/peerj.12611 (PMC8710051; doi:10.7717/peerj.12611)
Supplement: Supplemental Information 1 — Soil NO3−-N, NH4+-N, inorganic N, available P in seven N and P addition gradient [file peerj-09-12611-s001.xlsx]

## Sheet: Sheet1
N addition	NO3--N	NH4+-N	Inorganic N	Available P		P addition	NO3--N	NH4+-N	Inorganic N	Available P
CK	10.5988	10.2173	20.8162	13.6		CK	10.5988	10.2173	20.8162	13.6
CK	7.44277	7.12254	14.5653	9.4		CK	7.44277	7.12254	14.5653	9.4
CK	8.03815	7.71445	15.7526	8.9		CK	8.03815	7.71445	15.7526	8.9
CK	8.09827	7.76532	15.8636	8.5		CK	8.09827	7.76532	15.8636	8.5
N1	11.5618	11.3422	22.904	7.5		P1	9.51676	9.40347	18.9202	3.3
N1	13.3225	13.0555	26.378	8.5		P1	11.3931	11.3249	22.7179	5.3
N1	11.7422	11.4867	23.2289	6		P1	12.2277	12.0913	24.3191	4
N1	12.0855	11.8277	23.9133	6.9		P1	12.1341	11.9942	24.1283	4.4
N2	11.0208	10.7734	21.7942	7		P2	10.5919	10.4636	21.0555	9.6
N2	10.4127	10.2173	20.6301	8.2		P2	11.2509	11.1249	22.3757	4.1
N2	12.3757	12.0855	24.4613	8.4		P2	13.4254	13.2763	26.7017	5.5
N2	8.88324	8.64046	17.5237	7.4		P2	10.7399	10.6023	21.3422	6.6
N3	11.5607	11.2809	22.8416	7.3		P3	11.7133	11.5792	23.2925	5.9
N3	13.052	12.7249	25.7769	7.1		P3	10.1457	10.0208	20.1665	5.2
N3	10.8497	10.5503	21.4	5.9		P3	10.963	10.837	21.8	5
N3	12.6844	12.3549	25.0393	7.5		P3	10.6647	10.5376	21.2023	5.7
N4	10.2948	9.99653	20.2913	7.3		P4	13.7827	13.6243	27.4069	8.7
N4	8.24046	7.98728	16.2277	9.9		P4	13.7977	13.622	27.4197	13.4
N4	10.6347	10.3399	20.9746	7		P4	12.9133	12.7445	25.6578	8.7
N4	8.30289	8.03699	16.3399	7.8		P4	10.9121	10.7688	21.6809	5.1
N5	9.88555	9.59422	19.4798	7.3		P5	12.4	12.2497	24.6497	11.8
N5	10.9757	10.6486	21.6243	6.2		P5	11.5329	11.3838	22.9168	27.5
N5	11.178	10.8358	22.0139	8.4		P5	12.3249	12.1699	24.4948	13.1
N5	10.6832	10.3445	21.0277	7.1		P5	12.8266	12.6601	25.4867	8.5
N6	7.6578	7.37919	15.037	7.6		P6	15.8405	15.6358	31.4763	11.8
N6	7.83584	7.56185	15.3977	7.5		P6	12.8393	12.7272	25.5665	31.3
N6	7.84624	7.56647	15.4127	7.2		P6	14.8879	14.6775	29.5653	13.3
N6	7.99422	7.70636	15.7006	6.6		P6	12.3121	12.1191	24.4312	18.1
N7	15.1341	14.6855	29.8197	6.9		P7	14.0012	13.7919	27.7931	76
N7	10.5908	10.2012	20.7919	7.9		P7	10.2081	10.037	20.2451	47.5
N7	11.2751	10.8867	22.1618	7.9		P7	15.378	15.1503	30.5283	25.5
N7	9.6578	9.2948	18.9526	9.1		P7	19.7457	19.4254	39.1711	23.4
