# Supplementary material for: Effects of short-term nitrogen and phosphorus addition on leaf stoichiometry of a dominant alpine grass
Source: PeerJ. 2021 Dec 22;9:e12611. doi: 10.7717/peerj.12611 (PMC8710051; doi:10.7717/peerj.12611)
Supplement: Supplemental Information 2 — Leaf C, N, P in seven N and P addition gradient [file peerj-09-12611-s002.xlsx]

## Sheet: Sheet1
N addition	leaf C	leaf N	leaf P			P addition	leaf C	leaf N	leaf P
CK	396.5	27.58	2.38368			CK	396.5	27.58	2.38368
CK	402.3	30.11	2.48014			CK	402.3	30.11	2.48014
CK	405.3	29.95	2.2538			CK	405.3	29.95	2.2538
CK	397.3	26.74	2.12065			CK	397.3	26.74	2.12065
N1	422	31.88	2.20147			P1	409.4	28.72	2.47277
N1	416.4	30.33	2.36747			P1	419.1	28.59	2.46147
N1	409.8	29.11	2.37229			P1	419.7	30.38	2.62865
N1	428.3	31.71	2.66945			P1	409	29.14	2.53475
N2	420.6	30.56	2.33881			P2	405.4	29.34	2.71831
N2	427.1	32.99	2.2772			P2	405.2	30.99	2.50353
N2	424	30.67	2.36156			P2	412.4	30.49	2.75038
N2	417.6	31.47	2.187			P2	418.8	31.93	2.89524
N3	412.9	30.22	2.33195			P3	413.8	30.8	2.93317
N3	415.9	32.27	2.33776			P3	407.5	28.01	2.84438
N3	419.6	30.07	2.05332			P3	414.8	32.8	2.72191
N3	421.2	31.04	2.43237			P3	416.7	30.05	2.88982
N4	417.6	32.22	2.30631			P4	393.9	27.18	2.8986
N4	419.7	30.22	2.25353			P4	422.2	30.23	3.16395
N4	414.3	30.52	2.26011			P4	415.1	30.43	3.10145
N4	414.3	30.89	2.39836			P4	419.9	30.88	2.92658
N5	423.8	30.71	2.37881			P5	417.1	29.2	3.44442
N5	420.7	31.7	2.38891			P5	420.6	31.5	3.62016
N5	420.1	31.49	2.45071			P5	416.5	30.2	3.15596
N5	420.6	33.05	2.5029			P5	409.2	30.22	3.24755
N6	403.9	31.1	2.17385			P6	416.2	30.24	3.42649
N6	421.9	32.74	2.56074			P6	419.7	31.22	3.72477
N6	426.7	32.98	2.34079			P6	415.5	31.85	3.9596
N6	422.6	33.53	2.28782			P6	430.8	32.92	3.64482
N7	427.7	34.71	2.23083			P7	416.2	31.21	4.49211
N7	417.7	32.95	2.1182			P7	424.6	33.16	3.62589
N7	415.6	33.61	2.26286			P7	412.5	28.84	4.00478
N7	417.7	33.44	2.45919			P7	412.4	33.25	5.39332
