# Supplementary material for: Effects of short-term nitrogen and phosphorus addition on leaf stoichiometry of a dominant alpine grass
Source: PeerJ. 2021 Dec 22;9:e12611. doi: 10.7717/peerj.12611 (PMC8710051; doi:10.7717/peerj.12611)
Supplement: Supplemental Information 3 [file peerj-09-12611-s003.xlsx]

## Sheet: Sheet1
N addition	leaf C:N	leaf C:P	leaf N:P			P addition	leaf C:N	leaf C:P	leaf N:P
CK	14.3772	166.34	11.5704			CK	14.3772	166.34	11.5704
CK	13.3604	162.208	12.1404			CK	13.3604	162.208	12.1404
CK	13.5327	179.829	13.2887			CK	13.5327	179.829	13.2887
CK	14.8566	187.348	12.6094			CK	14.8566	187.348	12.6094
N1	13.2358	191.69	14.4812			P1	14.2568	165.563	11.6145
N1	13.7317	175.884	12.8111			P1	14.657	170.264	11.615
N1	14.0769	172.744	12.2708			P1	13.8147	159.664	11.5573
N1	13.5071	160.445	11.8788			P1	14.0377	161.357	11.4962
N2	13.7632	179.835	13.0665			P2	13.8185	149.137	10.7935
N2	12.9441	187.555	14.4871			P2	13.0761	161.851	12.3785
N2	13.8246	179.542	12.9872			P2	13.5249	149.943	11.0858
N2	13.27	190.947	14.3896			P2	13.1165	144.651	11.0285
N3	13.6621	177.062	12.9591			P3	13.4317	141.076	10.5006
N3	12.8892	177.905	13.8038			P3	14.5488	143.265	9.84749
N3	13.9553	204.352	14.6445			P3	12.6472	152.393	12.0504
N3	13.5706	173.164	12.7612			P3	13.8636	144.196	10.3986
N4	12.9587	181.068	13.9703			P4	14.4937	135.893	9.37694
N4	13.8906	186.241	13.4101			P4	13.9654	133.441	9.55452
N4	13.5724	183.31	13.5038			P4	13.6436	133.841	9.81153
N4	13.4112	172.743	12.8796			P4	13.5981	143.478	10.5516
N5	13.8002	178.156	12.9098			P5	14.2871	121.094	8.47749
N5	13.2683	176.106	13.2697			P5	13.3498	116.183	8.70127
N5	13.3387	171.42	12.8493			P5	13.7938	131.972	9.56919
N5	12.7253	168.045	13.2047			P5	13.542	126.003	9.30548
N6	12.9859	185.8	14.3064			P6	13.7642	121.465	8.82536
N6	12.8868	164.757	12.7854			P6	13.4406	112.678	8.38172
N6	12.938	182.289	14.0893			P6	13.0458	104.935	8.04374
N6	12.6054	184.717	14.6559			P6	13.0853	118.195	9.03199
N7	12.3219	191.722	15.5592			P7	13.3367	92.6512	6.94773
N7	12.6762	197.196	15.5557			P7	12.8028	117.102	9.14535
N7	12.3653	183.661	14.8529			P7	14.3015	103.002	7.20139
N7	12.4897	169.853	13.598			P7	12.4052	76.4649	6.16503
